# Supplementary material for: Nondiffracting skyrmion topology stairs of arbitrary trajectories
Source: Research Square preprint supplement (doi:10.21203/rs.3.rs-7215454/v1), 2025-08-04
Supplement: Supplementary file 1 [file 7a5452b5669fa8a05d493a9f.docx]

Supplementary Information for

Nondiffracting skyrmion topology stairs of arbitrary trajectories

Weiming Zhen1,2,4, †, Zhiming Qing1, †, Wenxiang Yan1, Zhi-Cheng Ren1,3, Xi-Lin Wang1,3, Hui-Tian Wang1,3, Yijie Shen2,5*, and Jianping Ding1,3*

1 National Laboratory of Solid State Microstructures and School of Physics, Nanjing University, Nanjing 210093, People’s Republic of China.

2 Centre for Disruptive Photonic Technologies, School of Physical and Mathematical Sciences, Nanyang Technological University, Singapore 637371, Singapore.

3Collaborative Innovation Center of Advanced Microstructures, Nanjing 210093, China

4Institute of Microscale Optoelectronics, Shenzhen University, Shenzhen 518060, People’s Republic of China.

5School of Electrical and Electronic Engineering, Nanyang Technological University, Singapore 639798, Singapore.

† These authors contributed equally.

* Corresponding authors: yijie.shen@ntu.edu.sg (Y. Shen), jpding@nju.edu.cn (J. Ding)

**Supplementary Information**

**The supplementary PDF file includes:**

Supplementary Note 1. The derivation of equation (3) in main text: the theory for the customizable non-diffracting skyrmionic beam (CNDSB)

Supplementary Note 2. Limitations of conventional Bessel beams in creating high-order skyrmions and selection for CNDSB-induced “complete” high-order non-diffracting skyrmions

**Supplementary Movies**

Video S1: Topology-stable Néel skyrmion (MP4)

Video S2: Topology-tunable skyrmion transformed between skyrmion and anti-skyrmion (MP4)

Video S3: Topology-tunable skyrmion transformed between skyrmion and bimeron (MP4)

Video S4: Topology-tunable skyrmion transformed between different topological orders (MP4)

Video S5: Trajectory-tunable skyrmion along an Archimedean spiral trajectory (MP4)

Video S6: Trajectory-tunable skyrmion along a parabolic trajectory (MP4)

**Supplementary Note**

**Supplementary Note 1：The derivation of equation (3) in main text: the theory for the customizable non-diffracting skyrmionic beam (CNDSB)**

Assuming that an initial scalar field of a radially symmetric spatial model carrying a vortex can be separated into the radial component of the spatial mode and the vortex phase component in cylindrical coordinates , i.e., , its angular spectrum can be expressed through a Fourier transform as:

where is the angular spectrum of the field , is referred to as the radial component of the angular spectrum function of the light field, represent the cylindrical coordinates in the k-space, should satisfy the condition , and denotes the *l*-order Bessel function of the first kind. Performing an inverse Fourier transform on the yields expression of the field in position space:

Therefore, the radial component of the spatial mode can be expressed as . Now, we aim to manipulate the propagation evolution of this spatial mode along the *z*-axis. According to the angular spectrum propagation theorem in Fourier optics [1], the field at *z* can be expressed as

and we get

By simplifying Eq. (S4) and using we obtain the important equation for generating a longitudinally tunable beam through the angular spectrum engineering

Now we explain the physical meaning of Eq. (S5). When *z* is truncated within a confined range, such as used in this work, retains the essential characteristics of an ideal customizable beam within this range and can be physically realizable. Considering a thin light sheet within the interval (z, z+Δz), the corresponding angular spectrum is given by

Thus, the superposition of these field slices across various *z* positions yields the total angular spectrum, as expressed in Eq. (S5).

Building on Eqs. (S5) and (S6) and utilizing the Bessel mode, we further demonstrate the multifunctional longitudinal modulation of a non-diffracting optical field. First, the light intensity, expressed as , and the additional phase variation, can be precisely manipulated. Meanwhile, the orbital angular momentum (OAM) state, characterized by its topological charge , can also be custom-designed and segmentally modulated during beam propagation. In addition, according to the Fourier phase-shifting theorem [1], At any given z-distance, the transformation from to can be achieved by imposing an additional phase factor on the angular spectrum. This implies the existence of the self-accelerating trajectory, characterized by the displacement vector with , where is the focal length of the Fourier lens performing an inverse Fourier transformation. Therefore, the non-diffracting light field with the controllable intensity, phase, and trajectory during propagation, can be realized through the following angular spectrum [2]:

The discussion above focuses on scalar fields. In fact, a vector field can be regarded as a composition of two independent and orthogonal scalar field components. By simultaneously applying angular spectrum engineering using Eq. (S7) to both components, Eq. (3) in the main text can be obtained.

**Supplementary Note 2：Limitations of conventional Bessel beams in creating high-order skyrmions and**  **selection for CNDSB-induced “complete” high-order non-diffracting skyrmions**

Skyrmion beams of first to third order can be constructed using Bessel modes, such as (RCP) and (LCP). When these two orthogonal components share the same , the radial intensity profiles of Bessel modes from 0 to 3 order at plane are presented in Figure S1(a). It is observed that, apart from the first-order Bessel mode with , where the peak intensity of the main lobe approximates that of the zeroth-order mode, the peak intensities of the main lobes for the second and third-order modes differ markedly from the zeroth-order mode. Consequently, the radial position of the main lobe—where the intensity reaches its maximum—in the higher-order Bessel mode does not align with the radial position of the first minimum of the zero-order Bessel mode, which hinders the formation of a “complete” optical skyrmion.


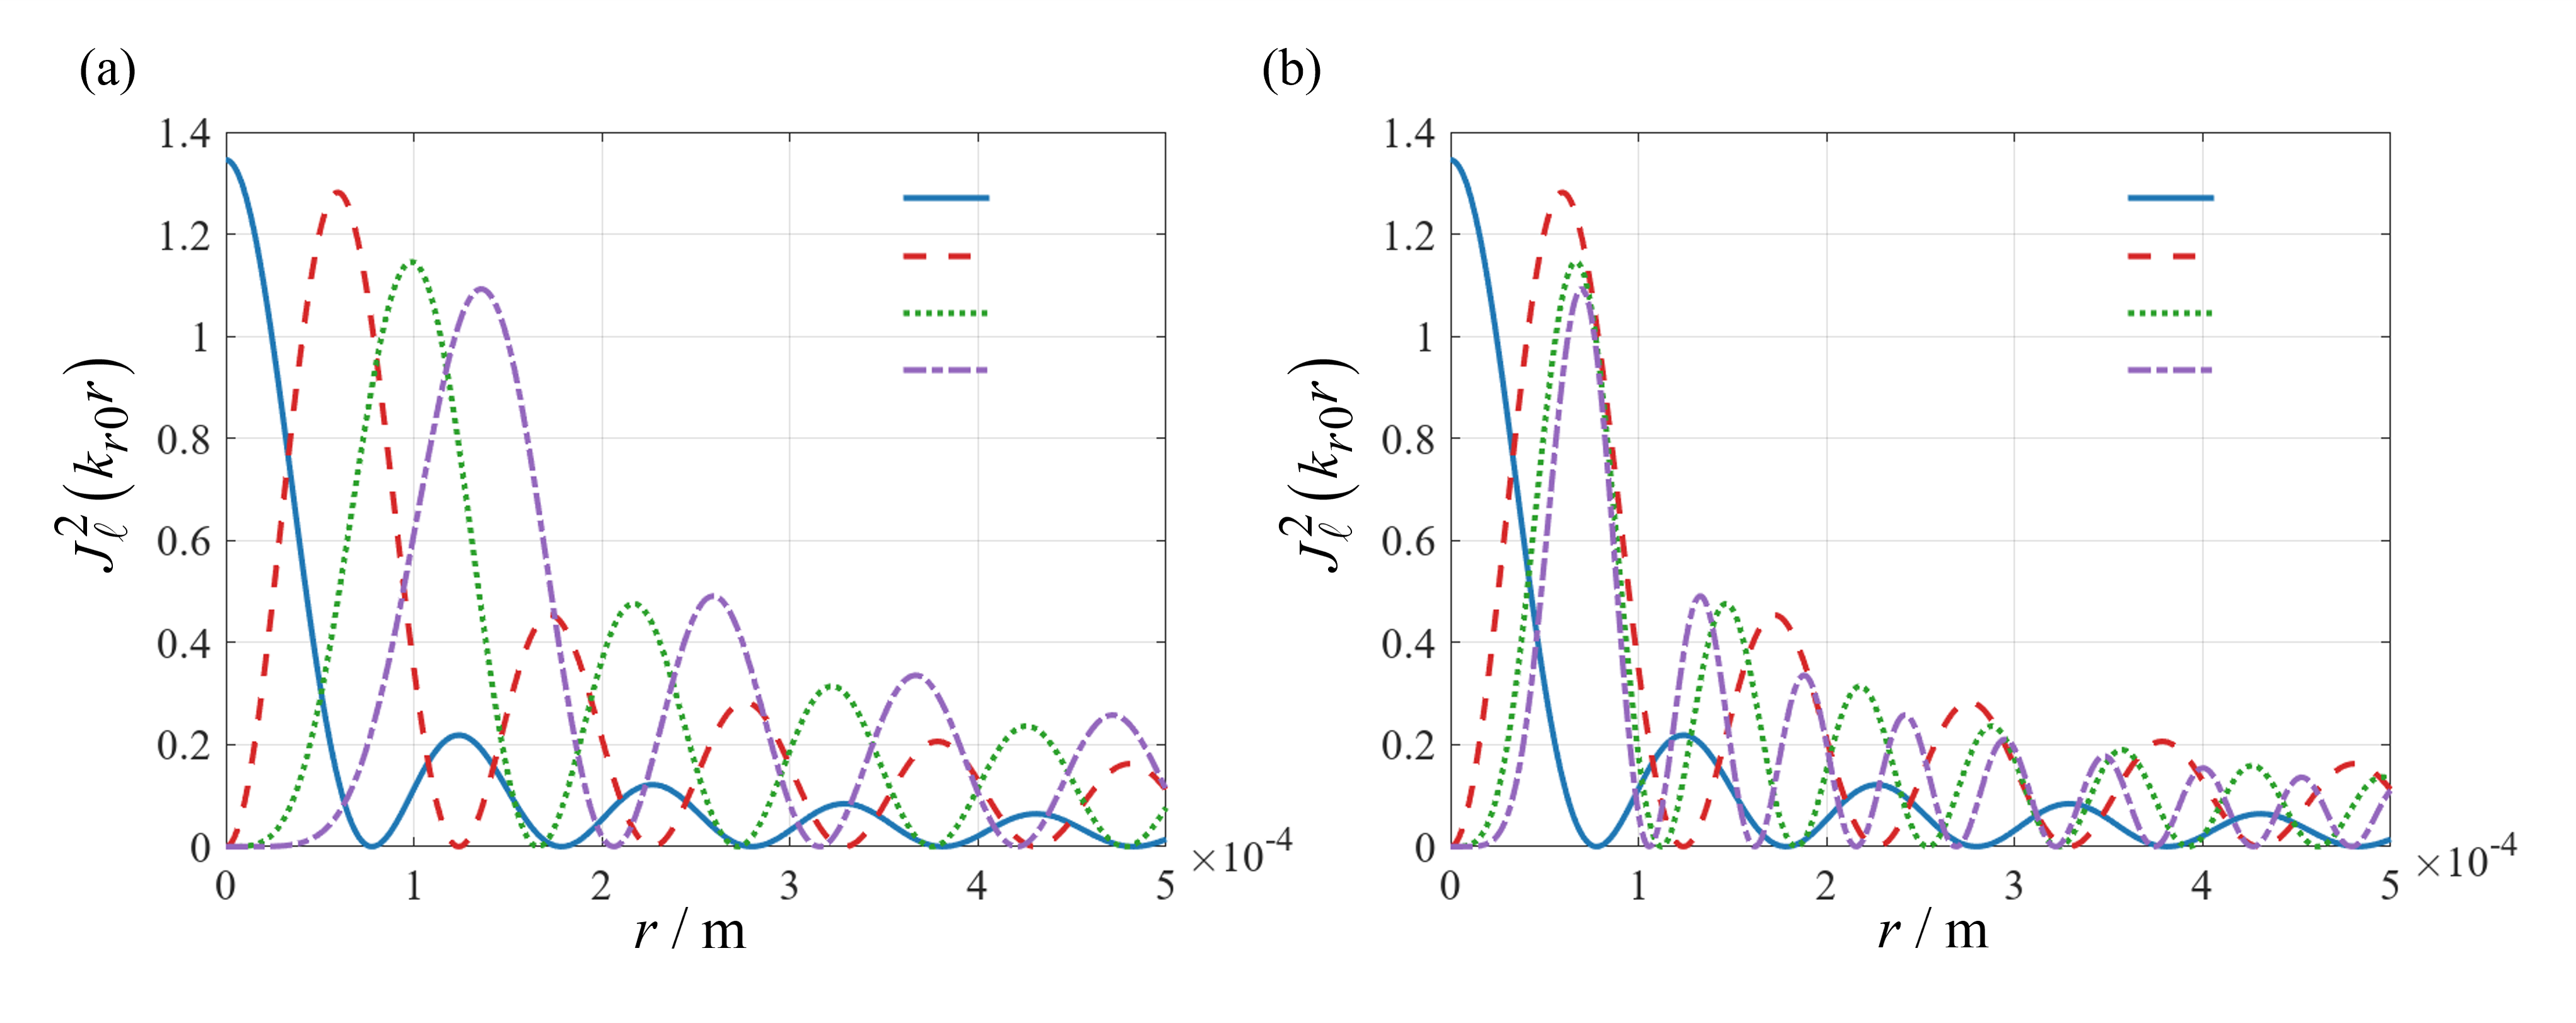


**Fig. S1 a.** Radial intensity profiles of Bessel mode with topological charges. b. Radial intensity profiles of modified Bessel mode generated by Eq. (S8) with topological charges .

To generate a “complete” optical skyrmion, it is necessary to adjust the  parameter of the corresponding higher-order Bessel mode in the LCP component. The relationship between  and the main ring radius can be expressed as [2] :

,

where .

Using Eq. (S8) the main lobe radius of the first-order Bessel mode is calculated to be. To address the discrepancies, we adjust the main lobe radii for the second and third-order modes to as well. By substituting this value into Eq. (S8), the modified  values are determined as for the second-order mode and for the third-order mode. The radial intensity profiles of the Bessel modes with the adjusted values are shown in Figure S1(b). In this case, the peak intensities of the primary lobes for the second and third-order modes are harmonized to closely match that of the zeroth-order Bessel mode. This adjustment facilitates the generation of the “complete” high-order non-diffracting Stokes skyrmions.

**Reference**

1. J. W. Goodman, *Introduction to Fourier optics* (Roberts and Company publishers, 2005).

2. W. Yan, Y. Gao, Z. Yuan et al., "Versatile Non-diffracting Perfect Vortex Beams," (2022), p. arXiv:2209.00481.
